1  
2 **Mechanical ventilation affects the microecology of the rat respiratory tract**

3 Mechanical ventilation and respiratory microecology

4 **Chen Xue-Meng<sup>1</sup> Liu Gao-Wang<sup>1</sup> Ling Xiao-Mei<sup>2</sup> Zeng Fan-Fang<sup>1</sup> Xiao Jin-Fang<sup>1\*</sup>**

5 1 Department of Anesthesiology, Nanfang Hospital, Southern Medical University, Guangzhou,  
6 Guangdong, China.

7 2. Guangdong Provincial People's Hospital , Guangdong Academy of Medical Sciences , Guangzhou,  
8 Guangdong, China.

9 Corresponding author: Xiao Jin-fang, Department of Anaesthesiology, Nanfang Hospital, Southern  
10 Medical University, Jingxi Street, Guangzhou 510515, Guangdong, China. Email:  
11 jinfangxiao100@163.com.  
12

13 **Abstract**

14 **Background** The most common 'second strike' in mechanically ventilated patients is a pulmonary  
15 infection caused by the ease with which bacteria can invade and colonize the lungs due to mechanical  
16 ventilation. At the same time, metastasis of lower airway microbiota may have significant implications  
17 in the development of intubation mechanical ventilation lung inflammation. Thus, we establish a rat  
18 model of tracheal intubation with mechanical ventilation and explore the effects of mechanical  
19 ventilation on lung injury and microbiological changes in rats.

20 **Methods** Sprague-Dawley rats were randomized into control, Spontaneously Breathing (1, 3, 6 hours),  
21 Mechanical ventilation(1, 3, 6 hours) groups. Lung wet to dry weight ratio (W/D weight ratio) and Lung  
22 histopathological injury score were evaluated.16SrDNA sequencing was performed to explore  
23 respiratory flora changes.

24 **Results** Bacterial diversity was comparable between healthy and intubation mechanical ventilation  
25 rats, with time relation. Ordination analyses revealed that samples clustered more dispersing by  
26 tracheal intubation and mechanical ventilation. Finally, predicted metagenomes suggested a  
27 substantial increase in biofilm formation phenotype during early tracheal intubation and mechanical  
28 ventilation.

29 **Conclusion** Collectively, these results establish a link between the duration of mechanical ventilation  
30 and alterations to the respiratory tract microecology. In future studies, we hope to discover the  
31 effectiveness of new immunomodulatory or probiotic bacteria to prevent airway diseases associated  
32 with ventilator therapy.

34 **Keywords:** Mechanical ventilation, lung injury, Respiratory tract, Microecology, Floraimbalance

35

36

## 37 **1. Introduction**

38 Ventilator mechanical ventilation is widely used to manage general anesthesia during surgery,  
39 respiratory maintenance in intensive care, and perioperative treatment of critically ill patients. However,  
40 mechanical ventilation can also lead to lung injury or exacerbate existing lung injury, known as  
41 ventilator-induced lung injury (VILI)<sup>1,2</sup>. Also, lung inflammation can occur during ventilator therapy.  
42 Current studies have found that mechanical ventilation induces upregulation of cytokine expression in  
43 a pro-inflammatory state to the body. Thus, patients are more susceptible to "second strikes"  
44 (prolonged mechanical ventilation, aspiration, shock, sepsis, pulmonary infections)<sup>3</sup>. The most  
45 common "second strike" in mechanically ventilated patients is pulmonary infections. The effects of the  
46 body's immune system from the own comorbidities and malnutrition in patients receiving mechanical  
47 ventilation under anesthesia<sup>6</sup> can also increase the morbidity and mortality of respiratory infections<sup>4</sup>.  
48 Respiratory microecology is one of the critical factors in the function of the respiratory tract. Studies  
49 over the past few years have demonstrated that the lower respiratory tract is not "sterile" and that, in  
50 healthy conditions, the lung microbiota is less dense but harbors a remarkable diversity of interacting  
51 microbiota. The ribosomal DNA of Actinobacteria, Aspergillus, Bacteroides, and Bacteroides is present  
52 in the lungs of healthy individuals<sup>5-8</sup>. The "steady state" of the lung microbiome during health may be  
53 a process of continuous influx and continuous elimination of unfavorable growth conditions. Studies  
54 have confirmed that the balance between immigration and elimination during pulmonary disease is  
55 disturbed. The pulmonary microbiota is altered, with bacteria exhibiting competitive dominance<sup>9</sup>,  
56 resulting in an imbalance in the host immune system<sup>7,10-12</sup>.

57 The imbalance of respiratory flora may lead to local or even systemic bacterial infections, and the  
58 microecological regulatory mechanisms are complex. Identification of microbial colonization by  
59 alveolar lavage collected primarily from critically ill patients is currently used clinically to guide  
60 anti-infection protocols, while few studies have been reported on the relationship between lung injury  
61 and inflammatory response to mechanical ventilation and changes in respiratory flora. Therefore, this  
62 study investigated the relationship between lung injury and microbiological changes in rats with  
63 tracheal intubation mechanical ventilation and contributed to the study of flora regulation of the  
64 respiratory tract in lung injury and inflammation.

65

66

## 67 **2. Materials and Methods**

68 To investigate the relationship between lung injury from mechanical ventilation and changes in  
69 respiratory flora, we assessed the inflammatory response and microbial changes in the rat airways by  
70 pathophysiology and 16SrDNA sequencing.

### 71 **2.2 Animals**

72 Male Sprague - Dawley rats (weighing between 230-330g and aged 8-9 wk) were housed at the  
73 Southern Hospital Experimental Centre of Southern Medical University, under the same temperature  
74 and humidity environment, and received the same food and water. Animal care and experimental  
75 protocols were guidelines by the National Science Council of the Republic of China(NSC1997). The  
76 animal studies were reviewed and approved by the Ethical Committee on Animal Experimentation of  
77 Nanfang Hospital, Southern Medical University , Guangzhou, China ( NFYY-2021-0245 ) .

78 Twenty-eight male SD rats were randomly divided into seven groups (n=4): control group (group C),  
79 tracheal intubation with spontaneous breathing for one hour (group SV1), tracheal intubation with  
80 spontaneous breathing for three hours (group SV3), tracheal intubation with spontaneous breathing for  
81 six hours (group SV6), tracheal intubation with mechanical ventilation for one hour (group MV1),  
82 tracheal intubation with mechanical ventilation for three hours (group MV3), tracheal intubation with  
83 mechanical ventilation for six hours (group MV6) (MV6 group). After weighing, we anesthetized the  
84 rats with 2% pentobarbital sodium (60 mg/kg) by intraperitoneal injection. We placed our homemade  
85 tracheal into the trachea and connected a small animal ventilator (SuperV1.0, HYB, China) for

86 mechanical ventilation. A room temperature of 26-28°C was maintained throughout the procedure. The  
87 control group was directly executed after tracheal intubation, while the SV group was intubated and left  
88 to breathe independently. The MV group was mechanically ventilated at 1, 3, and 6 hours, respectively.  
89 Mechanical ventilation parameters: tidal volume (VT) 7 ml/kg, PEEP = 0 mmHg, respiratory rate 80  
90 breaths/min (adjusted according to respiration during anaesthesia), inhalation-expiration ratio (I: E) =  
91 1:2, inhaled gas was air (oxygen concentration 21%).

## 92 **2.3 Experiments**

### 93 **2.3.1 Rat lung injury assay**

#### 94 **2.3.1.1 Lung tissue W/D**

95 To investigate the effect of the duration of mechanical ventilation on the edema of lung tissue, we  
96 calculated the wet to dry weight ratio (W/D) value of lung tissue. The tissue was weighed on an  
97 electronic balance and recorded as wet weight. The tissue was then baked in an oven at 80°C and  
98 weighed to a constant weight, and recorded as dry weight, and the lung tissue was baked for  $\geq 48$  h.

#### 99 **2.3.1.2 Histopathological examination of the lung**

100 To observe the pathological damage of lung tissue at different ventilation duration, we performed  
101 HE-stained light microscopy of lung tissue. The anterior lobe of the right lung of rats was fixed in 4%  
102 paraformaldehyde solution. After paraffin embedding, sectioning, and HE staining, the lung was placed  
103 under a light microscope to observe the histopathological changes. Five high magnification views were  
104 randomly selected to observe the lung tissue morphology, and the pictures were taken and saved.

105 Scores included lung tissue congestion, septal edema, erythrocyte infiltration, alveolar cavity  
106 destruction, capillary destruction, and other pathological changes, and the mean values were taken  
107 after scoring<sup>13,14</sup>.

## 108 **2.2.4 Detection of respiratory flora in rats**

### 109 **Specimen collection**

110 The trachea and left lung of 28 SD rats were removed, snap-frozen in liquid nitrogen, and stored in a  
111 -80°C refrigerator to sequence the 16SrDNA colonies.

### 112 **PCR amplification**

113 The 16S rDNA target region of the ribosomal RNA gene were amplified by PCR ( 95 °C for 5 min,  
114 followed by 30 cycles at 95 °C for 1 min, 60 °C for 1 min, and 72 °C for 1 min and a final extension at  
115 72 °C for 7 min ) using primers listed in the table<sup>15</sup>. PCR reactions were performed in triplicate 50 µL  
116 mixture containing 10 µL of 5 × Q5@ Reaction Buffer, 10 µL of 5 × Q5@ High GC Enhancer, 1.5 µL of  
117 2.5 mM dNTPs, 1.5 µL of each primer (10 µM), 0.2 µL of Q5@ High-Fidelity DNA Polymerase, and 50  
118 ng of template DNA. Related PCR reagents were from New England Biolabs, USA.

### 119 **DNA sequencing and analysis**

120 Illumina Novaseq 6000 sequencing Amplicons were extracted from 2% agarose gels and purified  
121 using the AxyPrep DNA Gel Extraction Kit (Axygen Biosciences, Union City, CA, U.S.) according to the  
122 manufacturer's instructions and quantified using ABI StepOnePlus Real-Time PCR System (Life  
123 Technologies , Foster City, USA). Purified amplicons were pooled in equimolar and paired-end  
124 sequenced (PE250) on an Illumina platform according to the standard protocols. The raw reads were  
125 deposited into the NCBI Sequence Read Archive (SRA) database (Accession Number: SRP\*\*\*\*\*).



## 126 **2.2.5 Statistical Methods**

127 For the ratio of Lung tissue W/D and lung injury score, One-way ANOVA test was completed. For  
128 Observe species index and Simpson index, comparisons were performed by the Turkey HSD test. The  
129 significant difference of Beta diversity was tested with Adonis non-parametric test. The Turkey HSD  
130 test compared the relative abundance of respiratory microbiota between groups. P-values less than  
131 0.05 were considered statistically significant. One-way ANOVA test was performed by SPSS software,  
132 version 25.0 (IBM Corp, New York, NY, USA). The Adonis non-parametric test was performed, and the  
133 Turkey HSD test was performed by the OmicShare tools, a free online platform for data analysis  
134 (<http://www.omicshare.com/tools>).

135

136

### 137 **3.Results**

#### 138 **Comparison of lung tissue W/D values between groups**

139 The W/D values of lung tissue in the SV and MV groups were significantly higher after three hours. ( $P <$   
140 0.05) (Table 1).

#### 141 **Pathological changes in lung tissue**

142 The alveolar structure of group C was normal, with a small number of inflammatory cells infiltrating  
143 the lung. Six hours into the SV group, there was significant hemorrhage, widening of the alveolar  
144 septum, lymphocytic infiltration, and massive destruction of the alveolar structure. Three hours into the  
145 MV group, diffuse intra-pulmonary hemorrhage was seen. Six hours into ventilation, massive diffuse  
146 hemorrhage was seen, widening of the alveolar septum, more exudate in the alveolar cavity,  
147 destruction of the tissue structure, fusion of the alveoli and solid lung tissue. The degree of lung tissue  
148 damage in the SV and MV groups increased with time (Figure 1).

#### 149 **Analysis of respiratory microbiological changes**

#### 150 **Analysis of the composition of the respiratory flora**

151 Dominant species largely determine the ecological and functional structure of the microbial community  
152 and understand the community's species composition. We analyzed the bacterial composition using  
153 16S rDNA gene sequencing. After filtering and screening at uniform depth, a total of 24 phyla and 244

154 genera were identified in the entire sample. To investigate the phylum and genus that accounted for  
155 most sequences, we selected species ranked top10 in abundance mean among all samples to show in  
156 detail. Others refer to other known species in the figure, and unclassified refer to unknown species <sup>16,17</sup>.  
157 The dominant phyla of rats were Proteobacteria, Firmicutes, Bacteroidetes, Cyanobacteria,  
158 Actinobacteria. In healthy rats, the dominant genus was Lactobacillus. In mechanically ventilated rats,  
159 the dominant genus was Acinetobacter at the beginning. The proportion of the dominant genus  
160 Acinetobacter decreased, and that of Prevotella\_9 increased as the duration of ventilation increased.  
161 The predominant genus in the respiratory tract of the rats was also Acinetobacter at the early stage of  
162 tracheal intubation, while the proportion of Streptococcus gradually increased with time (Figure 2a.  
163 Figure 2b). To further investigate the main flora specific to each group, we applied LEFse to analyze  
164 the differences in flora between the seven rat groups <sup>18</sup>. As shown in the figure(Figure 2c), only the  
165 normal rats and the 6hours group showed the main differential flora, Parvibacter for 6 hours of  
166 autonomic breathing, Megamonas for 6hours of mechanical ventilation, and normal rats  
167 Acinetobacter\_radioresistens.

168 As expected, the two operations of tracheal intubation and mechanical ventilation resulted in  
169 alterations in the respiratory microecology of rats. The main strains of normal adult BALF are  
170 Actinobacteria, Proteobacteria, Bacteroidetes, and Firmicutes <sup>5-8</sup>. The strains of rats in this study  
171 cover the main human strains and are similar to humans. It has been demonstrated that  
172 representatives of the genus Acinetobacter come from the lung microbiome of mechanically ventilated  
173 patients with suspected pneumonia <sup>19</sup>. In the present study, the elevated proportion of Acinetobacter  
174 as the dominant species during the initial phase of mechanical ventilation with tracheal intubation may

175 have contributed to the gradual pathological damage of lung tissue. As the duration of ventilation  
176 increased, the proportion of *Prevotella\_9* gradually increased, and it was considered that the  
177 subclinical lung inflammatory manifestations caused by mechanical ventilation created an environment  
178 for *Prevotella\_9* to be retained in the lungs<sup>20,21</sup>. Two classes of probiotics, *Parvibacter* and  
179 *Megamonas*, are often present in the intestinal tract of humans and animals, and the induction of  
180 mechanical ventilation by tracheal intubation itself may be associated with changes in intestinal  
181 microbial composition and diversity. There is now strong evidence that the gut microbiota can influence  
182 the microbiology of the lung through direct inoculation of bacteria or the distribution of SCFAs<sup>22,23</sup>.  
183 Characterization of lower airway probiotic bacteria associated with lung injury from tracheal intubation  
184 with mechanical ventilation may be necessary for in-depth exploration of methods to prevent such  
185 injury.

186 Interestingly, although many taxa are shared between samples, the absence of pathogens (e.g.,  
187 dominant genera) in one sample does not predict their absence in paired sample sequence data. For  
188 example, samples V1-1 and V3-1, despite not detecting *Sediminibacterium* and *Curvibacter*, showed  
189 trends consistent with other genus compared to controls. It is important to note that the dominant  
190 genus in samples V1-2 was *Streptococcus* and the second-highest proportion was *Acinetobacter*.  
191 These examples show that different pathogens can vary in different individuals of the same organism,  
192 and therefore, 16S rDNA sequence data are not always representative of lower respiratory tract  
193 infections. Lower airway Bacterial diversity varies in healthy and ventilator-assisted breathing rats.

### 194 **Alpha Diversity**

195 As mentioned above, in each sample, a few taxa dominate the majority of the sequences. Two alpha

196 diversity metrics, Observed species, and Simpson diversity were used to investigate this issue further  
197 to measure species richness and homogeneity<sup>24,25</sup>. The OTU was highest in the mechanically  
198 ventilated 6hours group, indicating the highest abundance. However, the difference between the  
199 control and autonomic breathing 6hours groups was not significant, and OUT abundance decreased at  
200 1hour and 3hours in both ventilated and autonomic breathing groups (Figure 3a). Using the Simpson  
201 diversity index, the abundance and homogeneity of the respiratory flora decreased in each  
202 experimental group compared with the control group, but the differences were not significant (Figure  
203 3b and Figure 3c ). These data suggest that mechanical ventilation tracheal intubation alters the  
204 abundance and homogeneity of lower airway microecology with time influenced.

### 205 **Beta Diversity**

206 Beta diversity of the respiratory microbiota was visualized using a ranking method. We were interested  
207 in whether the bacterial community aggregates tightly due to tracheal intubation or mechanical  
208 ventilation. Previous evidence suggests that three main factors determine the composition of the lower  
209 respiratory microbiota, namely microbial migration, microbial elimination, and the relative replication  
210 rate of its members.<sup>9</sup> The oral and pulmonary have similar microbiomes community<sup>1,9,26</sup>. A study has  
211 investigated that the oral microbiome is part of the homeostatic processes regulating lung  
212 inflammation<sup>26</sup>. Mechanical ventilation operations with tracheal intubation may dysregulate  
213 microecology by impairing lower airway defense mechanisms<sup>27,28</sup>. We hypothesized that samples are  
214 more intensively clustered by tracheal intubation and mechanical ventilation based on previous studies.  
215 To confirm this hypothesis, we used unweighted Unifrac and weighted Unifrac, two  
216 abundance-sensitive, phylogenetically relevant diversity metrics, to compare samples<sup>29</sup>. The two

217 metrics were calculated to determine the pairwise phylogenetic distances between each sample, then  
218 plotted using principal coordinate analysis (PCoA)<sup>30</sup>. From the unweighted Unifrac, contrary to our  
219 hypothesis, samples from the SV and MV groups did not cluster more closely with healthy rats  
220 (PERMANOVA,  $P=0.001$ ) (Figure 4a). The graph shows that the mechanically ventilated group  
221 (PERMANOVA,  $R^2=0.3737$ ,  $P=0.002$ ) and the autonomously ventilated group (PERMANOVA  
222  $R^2=0.4702$ ,  $P=0.002$ ) both exhibited moderate phylogenetic differences (Figure 4b, Figure 4c).  
223 Although experimental groups were better aggregated with healthy rats in terms of weighted Unifrac  
224 (PERMANOVA,  $P=0.122$ ), the autonomic breathing group exhibited more significant phylogenetic  
225 differences than the mechanically ventilated group (PERMANOVA,  $R^2=0.6939$ ,  $P=0.001$ ) (Figure 4d,  
226 Figure 4e, Figure 4f). These analyses suggest that the overall community structure of the rat lower  
227 airway is influenced by tracheal intubation and mechanical ventilation.

## 228 **Predicted functional categories (功能预测分析)**

229 To gain insight into the function of the bacterial community, PICRUST2<sup>31</sup> was implemented to infer  
230 bacterial metagenomes based on 16S rDNA gene content. There were 33 unique KEGG pathways  
231 among the inferred metagenomes and showed more remarkable similarities between normal rats and  
232 each ventilated group (Figure 5). This shows that mechanical ventilation by tracheal intubation does  
233 not significantly alter the functional capacity of the bacterial community in the lower respiratory tract of  
234 rats. To further summarize the output of PICRUST, we utilized BugBase, a bioinformatics tool that  
235 allows inference of community-wide phenotypes from predicted metagenomes<sup>32</sup>. BugBase found that  
236 gene function associated with anaerobiosis was enriched in the lower airway samples and,  
237 interestingly, gene function was reduced early in mechanical ventilation (CvsMV1  $P=0.013$ ). The

238 important genus attributed changed, with Proteobacteria being the dominant genus for 1hour of  
239 mechanical ventilation, and this dominance tended to decrease with time (Figure 6A). Biofilm  
240 formation and Gram-negative phenotypes were bacterial genus phenotypes frequently associated with  
241 respiratory pathogenicity. Our study suggested that biofilm formation phenotypes were substantially  
242 elevated during early tracheal intubation and mechanical ventilation, with Proteobacteria being the  
243 predominant cause of this phenotype. Moreover, Gram-negative phenotypes have no significant  
244 differences between groups, but phenotypes were more diverse in samples from 6hours of mechanical  
245 ventilation. Biofilm-forming bacteria were observed in the predicted metagenomes of each group. With  
246 the increasing understanding of the microbiota, we recognize interactions between the microbiota and  
247 the immune system of the airway epithelium. For example, asthma and allergy<sup>11</sup> vary with the  
248 occurrence of airway infections. Studies have confirmed that microinhalation, external pressure, etc.,  
249 favor the establishment of microbial biofilms. Biofilms have significant antimicrobial tolerance, evading  
250 host immune system attack and persisting in the host<sup>33</sup>. In the present study, biofilm-associated gene  
251 phenotypes were enhanced in rats undergoing mechanical ventilation with tracheal intubation,  
252 indicating enhanced biogenesis, consistent with previous studies<sup>34</sup>. Overall, these data suggest that  
253 the initial phase of mechanical ventilation by tracheal intubation disrupts the ecotone. Anaerobic  
254 phenotypic function decreased, and other phenotypes associated with bacterial pathogenicities also  
255 were influenced. However, it is also difficult to explain whether the reduced diversity of the  
256 microbiome is a causative factor for disease or whether diversity is simply a response to disease  
257 inflammation.

258

259

260

261

262

263

264

265

266



## 267 4. Discussion

268 With the continuous medical advances, tracheal intubation mechanical ventilation has been widely  
269 used in managing general anesthesia during surgery, intensive care units, and emergency  
270 resuscitation of critically ill patients. However, mechanical ventilation is also a "double-edged sword,"  
271 which may lead to lung injury or aggravate existing lung injury<sup>35,36</sup>. Volume injury due to lung  
272 hyperinflation and shear injury due to repeated opening and closing of the terminal airway play an  
273 essential role in the pathogenesis of VILI<sup>3</sup>. On the other hand, respiratory inflammation may occur  
274 during ventilatory therapy. As an open cavity between the human body and the outside world, the  
275 respiratory tract has a normal microbiota that is an integral part of the human body's natural defense.  
276 Respiratory microbiota provides a biological barrier against the invasion of foreign bodies or  
277 pathogenic bacteria through mechanisms such as spatial occupancy, healthy competition, and  
278 secretion of antibacterial or bactericidal substances<sup>37-40</sup>. As one of the most frequently contacted parts  
279 of the human body, the respiratory micro-ecosystem is essential in maintaining human health and is  
280 also most vulnerable to damage. In recent years, the lower respiratory tract microbiota has been  
281 extensively studied and reported to be similar to that of the oropharynx<sup>1,2,41</sup>. However, studies  
282 exploring the relationship between mechanical ventilation and lower airway microecology have mainly  
283 explored at the level of ventilator-associated pneumonia (VAP)<sup>42-45</sup>. Changes in lower airway  
284 microecology during the initial phase of mechanical ventilation have not been reported. To investigate  
285 the in vivo response of tracheal intubation mechanical ventilation on lower respiratory microecology in  
286 SD rats in this study, we obtained pathological findings of lung inflammation and injury and data on  
287 bacterial community structure.

288 In the present study, we observed that three hours after the administration of mechanical ventilation  
289 with tracheal intubation, hemorrhagic spots appeared in the lung tissue, widening of the alveolar  
290 septum, large amounts of exudate in the alveolar cavity, and altered alveolar structural damage, which  
291 aggravated with time. Correspondingly, the highest percentage of Proteobacteria was present in the  
292 experimental and control groups. At the onset of mechanical ventilation, the percentage of  
293 Proteobacteria in the lower airways increased more than twofold compared to controls. At the same  
294 time, the number of Firmicutes and Bacteroidetes decreased about fourfold. When six hours of  
295 mechanical ventilation had elapsed, Actinobacteria was more than four times that of the control group.  
296 These results suggest that mechanical ventilation with tracheal intubation alters the structure of the  
297 microecology while inducing lung tissue damage. However, how bacterial changes and tissue damage  
298 interact and require further study. We observed a significant amount of Acinetobacter within three  
299 hours of mechanical ventilation; therefore, Acinetobacter may be one of the factors involved in  
300 mediating the proinflammatory phase of lung tissue injury. It has been demonstrated that  
301 Acinetobacter may be the predominant bacteria in the lung microbiota of mechanically ventilated  
302 patients with pneumonia<sup>19</sup>. The excessive growth of this pathogen may promote airway injury and  
303 exacerbate microecological dysregulation. Lactobacillus and Streptococcus gradually increase with  
304 prolonged ventilation. Lactobacillus and Streptococcus act as probiotic strains. On the one hand,  
305 altering the composition of the host-microbiome dysregulate the microecology. On the other hand, they  
306 act indirectly through the standard mucosal immune system (CMIS)<sup>46</sup>. These probiotic strains may  
307 play a positive role in alleviating respiratory impairment and the corresponding microecological  
308 imbalance. In the mechanically ventilated 6-hour group, the main differential bacteria genus

309 Prevotella\_9 likewise belongs to probiotic bacteria and is often present in the intestine. Current studies  
310 have confirmed the existence of an intestinal-pulmonary microbiome axis in the organism<sup>47</sup>. AS the  
311 metabolically active bacteria, Bacteroides and Firmicutes produce SCFA. We know that the gut  
312 microbiota can influence the microbiology of the lung through the distribution of SCFAs. SCFAs play a  
313 key role in maintaining mucosal immunity in the gut and lung tissues as a bridge between the  
314 microbiota and the immune system.<sup>22,23</sup>. Our findings may be relevant to understanding the  
315 mechanisms between tracheal intubation mechanical ventilation and lung tissue injury. Mechanical  
316 ventilation by tracheal intubation leads to an inflammatory response characterized by impaired airway  
317 defense mechanisms and alters in the microenvironment structure of the lower airways. In the future,  
318 we will further investigate probiotics to assess the prognostic relevance of microbial imbalance and the  
319 effectiveness of specific therapeutic interventions.

320 We analyzed lower airway microorganisms' alpha and beta diversity. We found that both tracheal  
321 intubation and mechanical ventilation cause changes in the microbial composition of the lower airways.  
322 At the beginning of tracheal intubation mechanical ventilation, bacterial species diversity decreased,  
323 indicating that intubation ventilation impaired the ecological niche balance in the lower airways of rats  
324 and disturbed bacterial diversity. Six hours after ventilation, bacterial diversity was elevated, and  
325 species composition remained different from healthy rats, considering that it may be related to  
326 pathogen overgrowth and stimulation of the host immune system that promotes disease  
327 development<sup>48</sup>. It is noteworthy that the experimental and control groups differed in bacterial species  
328 abundance but were more homogeneous. As seen in this study, the samples from the experimental  
329 and control groups were not well aggregated, suggesting that the overall community structure of the

330 rat lower airway is influenced by tracheal intubation and mechanical ventilation. However, the sample  
331 size of the groups in this experiment was small, and there were subject differences between  
332 individuals<sup>37,39,49</sup>. The sample size needs to be increased in subsequent experiments to explore the  
333 relationship between the two further.

334 There may be a relationship between mechanical ventilation status and airway immune function.  
335 Previous studies have shown that lower respiratory microbes are essential in the immune system's  
336 maturation, education, and function. Especially, the regulation of the inflammatory response in  
337 respiratory diseases such as asthma<sup>50</sup>, chronic obstructive pulmonary disease (COPD)<sup>51</sup>, cystic  
338 fibrosis<sup>52</sup>, and respiratory infections<sup>53</sup> plays a key role. Ecological dysregulation leads to overgrowth  
339 of pathogenic bacteria, loss of symbiotic microbial diversity, and, ultimately, an inflammatory response  
340 in the host, leading to disease<sup>54 55</sup>. In the present study, after stimulation by mechanical ventilation  
341 with tracheal intubation, the microecological balance in the lower airways was disturbed, the loss of  
342 symbiotic microbial diversity, the immune system was affected, and inflammatory pathological changes  
343 began to develop in the lung tissue. The inflammatory cascade response and pro-inflammatory  
344 cytokines are hyperactivated with prolonged mechanical ventilation. Eventually, lung tissue increased  
345 damage. In BugBase functional analysis, we found biofilm formation gene-function phenotypes  
346 elevated abundance compared to the control group. It may be associated with damage to airway  
347 epithelial cells and disruption of defense mechanisms due to stimulation by tracheal intubation  
348 mechanical ventilation maneuvers. Biofilms have significant antimicrobial tolerance and can persist in  
349 the host and evade the host immune system<sup>33,56</sup>. We know that specialized respiratory epithelial cells  
350 are necessary to maintain immune homeostasis in the lower airway tract. As the first line of defense

351 against potentially harmful environmental stimuli, respiratory epithelial cells are involved in maintaining  
352 immune homeostasis. Thus, epithelial cell dysfunction may influence the development of many  
353 airways and pulmonary inflammatory diseases<sup>57,58</sup>. In addition, it has been demonstrated that NF- $\kappa$ B,  
354 TINCR, and PGLYRP4 (rs3006458) are involved in airway immune mechanisms<sup>59,60</sup>. In future studies,  
355 we hope to investigate further the relationship between the mechanical ventilation status of tracheal  
356 intubation alone and epithelial cell alterations. We will make predictions of relevant metabolic  
357 pathways by metatranscriptomic metabolomic and proteomic studies.

358 In conclusion, our findings may be relevant to understanding the altered immune system mechanisms  
359 between tracheal intubation mechanical ventilation and lung tissue injury. Such operations as tracheal  
360 intubation ventilator-assisted ventilation lead to lung injury and inflammatory responses characterized  
361 by changes in the microbial community of the lower airways that become temporally correlated. The  
362 present study provides new ideas for functional studies on the role of pulmonary commensals in  
363 airway morphogenesis development, epithelial homeostasis, and the immune system. Particularly, it  
364 allows a more systematic study of bacteria's colonization and growth characteristics on pulmonary  
365 epithelial cells, their impact on lung infection and inflammation. Future studies hope to discover the  
366 effectiveness of new immunomodulatory or probiotic bacteria to prevent airway diseases associated  
367 with intraoperative or postoperative short-term intubation.

371

372 **Reference :**

- 373 1. Huffnagle GB, Dickson RP, Lukacs NW. The respiratory tract microbiome and lung inflammation: a two-way  
374 street. *Mucosal Immunol.* 2017;10(2):299-306. doi:10.1038/mi.2016.108
- 375 2. Pragman AA, Lyu T, Baller JA, et al. The lung tissue microbiota of mild and moderate chronic obstructive  
376 pulmonary disease. *Microbiome.* 2018;6(1):7. doi:10.1186/s40168-017-0381-4
- 377 3. Brégeon F, Roch A, Delpierre S, et al. Conventional mechanical ventilation of healthy lungs induced  
378 pro-inflammatory cytokine gene transcription. *Respir Physiol Neurobiol.* 2002;132(2):191-203.  
379 doi:10.1016/s1569-9048(02)00069-1
- 380 4. Sigalet DL, Mackenzie SL, Hameed SM. Enteral nutrition and mucosal immunity: implications for feeding  
381 strategies in surgery and trauma. *Can J Surg.* 2004;47(2):109-116.
- 382 5. Charlson ES, Bittinger K, Haas AR, et al. Topographical continuity of bacterial populations in the healthy human  
383 respiratory tract. *Am J Respir Crit Care Med.* 2011;184(8):957-963. doi:10.1164/rccm.201104-0655OC
- 384 6. Segal LN, Alekseyenko AV, Clemente JC, et al. Enrichment of lung microbiome with supraglottic taxa is  
385 associated with increased pulmonary inflammation. *Microbiome.* 2013;1(1):19. doi:10.1186/2049-2618-1-19
- 386 7. Sze MA, Dimitriu PA, Hayashi S, et al. The lung tissue microbiome in chronic obstructive pulmonary disease.  
387 *Am J Respir Crit Care Med.* 2012;185(10):1073-1080. doi:10.1164/rccm.201111-2075OC
- 388 8. Segal LN, Blaser MJ. A brave new world: the lung microbiota in an era of change. *Ann Am Thorac Soc.* 2014;11

- 389       Suppl 1:S21-27. doi:10.1513/AnnalsATS.201306-189MG
- 390   9.   Dickson RP, Huffnagle GB. The Lung Microbiome: New Principles for Respiratory Bacteriology in Health and  
391       Disease. *PLoS Pathog.* 2015;11(7):e1004923. doi:10.1371/journal.ppat.1004923
- 392   10.   Monsó E. Microbiome in chronic obstructive pulmonary disease. *Ann Transl Med.* 2017;5(12):251.  
393       doi:10.21037/atm.2017.04.20
- 394   11.   Dickson RP, Erb-Downward JR, Huffnagle GB. The role of the bacterial microbiome in lung disease. *Expert Rev*  
395       *Respir Med.* 2013;7(3):245-257. doi:10.1586/ers.13.24
- 396   12.   Dickson RP, Erb-Downward JR, Falkowski NR, Hunter EM, Ashley SL, Huffnagle GB. The Lung Microbiota of  
397       Healthy Mice Are Highly Variable, Cluster by Environment, and Reflect Variation in Baseline Lung Innate  
398       Immunity. *Am J Respir Crit Care Med.* 2018;198(4):497-508. doi:10.1164/rccm.201711-2180OC
- 399   13.   Cheng C, Li S, Wang Y, Chen S, You L, Zhang H. Ischemic postconditioning alleviates lung injury and  
400       maintains a better expression of aquaporin-1 during cardiopulmonary bypass. *Chin Med J (Engl).*  
401       2014;127(23):4012-4018.
- 402   14.   dos Santos CC, Okutani D, Hu P, et al. Differential gene profiling in acute lung injury identifies injury-specific  
403       gene expression. *Crit Care Med.* 2008;36(3):855-865. doi:10.1097/CCM.0B013E3181659333
- 404   15.   Guo M, Wu F, Hao G, et al. *Bacillus subtilis* Improves Immunity and Disease Resistance in Rabbits. *Front*  
405       *Immunol.* 2017;8:354. doi:10.3389/fimmu.2017.00354
- 406   16.   Wickham H. ggplot2. *WIREs Computational Statistics.* 2011;3(2):180-185. doi:10.1002/wics.147

- 407 17. Ondov BD, Bergman NH, Phillippy AM. Interactive metagenomic visualization in a Web browser. *BMC*  
408 *Bioinformatics*. 2011;12:385. doi:10.1186/1471-2105-12-385
- 409 18. Segata N, Izard J, Waldron L, et al. Metagenomic biomarker discovery and explanation. *Genome Biol.*  
410 2011;12(6):R60. doi:10.1186/gb-2011-12-6-r60
- 411 19. Toma I, Siegel MO, Keiser J, et al. Single-molecule long-read 16S sequencing to characterize the lung  
412 microbiome from mechanically ventilated patients with suspected pneumonia. *J Clin Microbiol.*  
413 2014;52(11):3913-3921. doi:10.1128/JCM.01678-14
- 414 20. Larsen JM, Steen-Jensen DB, Laursen JM, et al. Divergent pro-inflammatory profile of human dendritic cells in  
415 response to commensal and pathogenic bacteria associated with the airway microbiota. *PLoS One.*  
416 2012;7(2):e31976. doi:10.1371/journal.pone.0031976
- 417 21. Larsen JM, Musavian HS, Butt TM, Ingvorsen C, Thyssen AH, Brix S. Chronic obstructive pulmonary disease  
418 and asthma-associated Proteobacteria, but not commensal *Prevotella* spp., promote Toll-like receptor  
419 2-independent lung inflammation and pathology. *Immunology*. 2015;144(2):333-342. doi:10.1111/imm.12376
- 420 22. Samuelson DR, Welsh DA, Shellito JE. Regulation of lung immunity and host defense by the intestinal  
421 microbiota. *Front Microbiol*. 2015;6:1085. doi:10.3389/fmicb.2015.01085
- 422 23. Dang AT, Marsland BJ. Microbes, metabolites, and the gut-lung axis. *Mucosal Immunol*. 2019;12(4):843-850.  
423 doi:10.1038/s41385-019-0160-6
- 424 24. Hill MO. Diversity and Evenness: A Unifying Notation and Its Consequences. *Ecology*. 1973;54(2):427-432.  
425 doi:10.2307/1934352



- 426 25. Kembel SW, Cowan PD, Helmus MR, et al. Picante: R tools for integrating phylogenies and ecology.  
427 *Bioinformatics*. 2010;26(11):1463-1464. doi:10.1093/bioinformatics/btq166
- 428 26. Segal LN, Clemente JC, Tsay JCJ, et al. Enrichment of the lung microbiome with oral taxa is associated with  
429 lung inflammation of a Th17 phenotype. *Nat Microbiol*. 2016;1:16031. doi:10.1038/nmicrobiol.2016.31
- 430 27. Bauer TT, Torres A, Ferrer R, Heyer CM, Schultze-Werninghaus G, Rasche K. Biofilm formation in  
431 endotracheal tubes. Association between pneumonia and the persistence of pathogens. *Monaldi Arch Chest*  
432 *Dis*. 2002;57(1):84-87.
- 433 28. Gil-Perotin S, Ramirez P, Marti V, et al. Implications of endotracheal tube biofilm in ventilator-associated  
434 pneumonia response: a state of concept. *Crit Care*. 2012;16(3):R93. doi:10.1186/cc11357
- 435 29. Lozupone C, Knight R. UniFrac: a new phylogenetic method for comparing microbial communities. *Appl Environ*  
436 *Microbiol*. 2005;71(12):8228-8235. doi:10.1128/AEM.71.12.8228-8235.2005
- 437 30. El Kurdi R, Kumar K, Patra D. Introducing Principal Coordinate Analysis (PCoA) Assisted EEMF Spectroscopic  
438 Based Novel Analytical Approach for the Discrimination of Commercial Gasoline Fuels. *J Fluoresc*.  
439 2020;30(6):1583-1589. doi:10.1007/s10895-020-02617-9
- 440 31. Langille MGI, Zaneveld J, Caporaso JG, et al. Predictive functional profiling of microbial communities using 16S  
441 rRNA marker gene sequences. *Nat Biotechnol*. 2013;31(9):814-821. doi:10.1038/nbt.2676
- 442 32. Ward T, Larson J, Meulemans J, et al. *BugBase Predicts Organism-Level Microbiome Phenotypes.*; 2017.  
443 doi:10.1101/133462

- 444 33. Lee AL, Goldstein RS. Gastroesophageal reflux disease in COPD: links and risks. *Int J Chron Obstruct Pulmon*  
445 *Dis.* 2015;10:1935-1949. doi:10.2147/COPD.S77562
- 446 34. Vandecandelaere I, Matthijs N, Van Nieuwerburgh F, et al. Assessment of microbial diversity in biofilms  
447 recovered from endotracheal tubes using culture dependent and independent approaches. *PLoS One.*  
448 2012;7(6):e38401. doi:10.1371/journal.pone.0038401
- 449 35. Gajic O, Dara SI, Mendez JL, et al. Ventilator-associated lung injury in patients without acute lung injury at the  
450 onset of mechanical ventilation. *Crit Care Med.* 2004;32(9):1817-1824.  
451 doi:10.1097/01.ccm.0000133019.52531.30
- 452 36. Acute Respiratory Distress Syndrome Network, Brower RG, Matthay MA, et al. Ventilation with lower tidal  
453 volumes as compared with traditional tidal volumes for acute lung injury and the acute respiratory distress  
454 syndrome. *N Engl J Med.* 2000;342(18):1301-1308. doi:10.1056/NEJM200005043421801
- 455 37. Wu H, Kuzmenko A, Wan S, et al. Surfactant proteins A and D inhibit the growth of Gram-negative bacteria by  
456 increasing membrane permeability. *J Clin Invest.* 2003;111(10):1589-1602. doi:10.1172/JCI16889
- 457 38. Munyard P, Bush A. How much coughing is normal? *Arch Dis Child.* 1996;74(6):531-534.  
458 doi:10.1136/adc.74.6.531
- 459 39. Dickson RP, Martinez FJ, Huffnagle GB. The role of the microbiome in exacerbations of chronic lung diseases.  
460 *Lancet.* 2014;384(9944):691-702. doi:10.1016/S0140-6736(14)61136-3
- 461 40. Dickson RP, Erb-Downward JR, Huffnagle GB. Towards an ecology of the lung: new conceptual models of  
462 pulmonary microbiology and pneumonia pathogenesis. *Lancet Respir Med.* 2014;2(3):238-246.

463 doi:10.1016/S2213-2600(14)70028-1

464 41. Bassis CM, Erb-Downward JR, Dickson RP, et al. Analysis of the upper respiratory tract microbiotas as the  
465 source of the lung and gastric microbiotas in healthy individuals. *mBio*. 2015;6(2):e00037.

466 doi:10.1128/mBio.00037-15

467 42. Huang Y, Jiao Y, Zhang J, et al. Microbial Etiology and Prognostic Factors of Ventilator-associated Pneumonia:  
468 A Multicenter Retrospective Study in Shanghai. *Clin Infect Dis*. 2018;67(suppl\_2):S146-S152.

469 doi:10.1093/cid/ciy686

470 43. Luyt CE, Hékimian G, Koulenti D, Chastre J. Microbial cause of ICU-acquired pneumonia: hospital-acquired  
471 pneumonia versus ventilator-associated pneumonia. *Curr Opin Crit Care*. 2018;24(5):332-338.

472 doi:10.1097/MCC.0000000000000526

473 44. Bailey KL, Kalil AC. Ventilator-Associated Pneumonia (VAP) with Multidrug-Resistant (MDR) Pathogens:  
474 Optimal Treatment? *Curr Infect Dis Rep*. 2015;17(8):494. doi:10.1007/s11908-015-0494-5

475 45. Di Pasquale M, Ferrer M, Esperatti M, et al. Assessment of severity of ICU-acquired pneumonia and  
476 association with etiology. *Crit Care Med*. 2014;42(2):303-312. doi:10.1097/CCM.0b013e3182a272a2

477 46. Thaiss CA, Zmora N, Levy M, Elinav E. The microbiome and innate immunity. *Nature*. 2016;535(7610):65-74.

478 doi:10.1038/nature18847

479 47. Budden KF, Gellatly SL, Wood DLA, et al. Emerging pathogenic links between microbiota and the gut-lung axis.

480 *Nat Rev Microbiol*. 2017;15(1):55-63. doi:10.1038/nrmicro.2016.142

- 481 48. Fujimura KE, Lynch SV. Microbiota in allergy and asthma and the emerging relationship with the gut  
482 microbiome. *Cell Host Microbe*. 2015;17(5):592-602. doi:10.1016/j.chom.2015.04.007
- 483 49. Dreyfuss D, Saumon G. Ventilator-induced lung injury: lessons from experimental studies. *Am J Respir Crit*  
484 *Care Med*. 1998;157(1):294-323. doi:10.1164/ajrccm.157.1.9604014
- 485 50. Ling Z, Liu X, Cheng Y, Li L. Potential roles of disordered airway microbiota in patients with severe asthma. *J*  
486 *Allergy Clin Immunol*. 2016;137(2):648. doi:10.1016/j.jaci.2015.09.043
- 487 51. Huang YJ, Erb-Downward JR, Dickson RP, Curtis JL, Huffnagle GB, Han MK. Understanding the role of the  
488 microbiome in chronic obstructive pulmonary disease: principles, challenges, and future directions. *Transl Res*.  
489 2017;179:71-83. doi:10.1016/j.trsl.2016.06.007
- 490 52. Madan JC. Neonatal Gastrointestinal and Respiratory Microbiome in Cystic Fibrosis: Potential Interactions and  
491 Implications for Systemic Health. *Clin Ther*. 2016;38(4):740-746. doi:10.1016/j.clinthera.2016.02.008
- 492 53. Yin Y, Hountras P, Wunderink RG. The microbiome in mechanically ventilated patients. *Curr Opin Infect Dis*.  
493 2017;30(2):208-213. doi:10.1097/QCO.0000000000000352
- 494 54. Haahtela T, Holgate S, Pawankar R, et al. The biodiversity hypothesis and allergic disease: world allergy  
495 organization position statement. *World Allergy Organ J*. 2013;6(1):3. doi:10.1186/1939-4551-6-3
- 496 55. Fujimura KE, Slusher NA, Cabana MD, Lynch SV. Role of the gut microbiota in defining human health. *Expert*  
497 *Rev Anti Infect Ther*. 2010;8(4):435-454. doi:10.1586/eri.10.14
- 498 56. Thurlow LR, Hanke ML, Fritz T, et al. Staphylococcus aureus biofilms prevent macrophage phagocytosis and

- 499 attenuate inflammation in vivo. *J Immunol.* 2011;186(11):6585-6596. doi:10.4049/jimmunol.1002794
- 500 57. Hooper LV, Littman DR, Macpherson AJ. Interactions between the microbiota and the immune system. *Science.*  
501 2012;336(6086):1268-1273. doi:10.1126/science.1223490
- 502 58. Hiemstra PS, McCray PB, Bals R. The innate immune function of airway epithelial cells in inflammatory lung  
503 disease. *Eur Respir J.* 2015;45(4):1150-1162. doi:10.1183/09031936.00141514
- 504 59. Igartua C, Davenport ER, Gilad Y, Nicolae DL, Pinto J, Ober C. Host genetic variation in mucosal immunity  
505 pathways influences the upper airway microbiome. *Microbiome.* 2017;5(1):16. doi:10.1186/s40168-016-0227-5
- 506 60. McAleer JP, Kolls JK. Contributions of the intestinal microbiome in lung immunity. *Eur J Immunol.*  
507 2018;48(1):39-49. doi:10.1002/eji.201646721

508

509

510

511

512

513

514

515

516 **Figure legend**

517 **Figure 1.** Effect of mechanical ventilation on lung tissues injury from rats. (a) Rats were executed  
518 directly after tracheal intubation under anesthesia. (b-d) Rats were kept under anesthesia after  
519 tracheal intubation with spontaneous breathing for 1, 3, and 6 h. (e-g). Rats were mechanically  
520 ventilated for 1, 3, and 6 h after tracheal intubation. (h) Lung tissue injury score. Data are  
521 representative of at least four different experiments. Results are mean  $\pm$  S, for four rats. \* $p < 0.05$ ,  
522 \*\* $p < 0.01$ , \*\*\* $p < 0.001$ , compared with control animals or between mechanical ventilation six hours and  
523 spontaneous breathing six hours.

524 **Figure 2.** Changes in the lower respiratory tract flora of rats during mechanical ventilation. (a) At the  
525 phylum level, the main dominant phyla were Proteobacteria, Firmicutes, Bacteroidetes, Cyanobacteria,  
526 and Actinobacteria. (b) At the genus level, the main dominant genera were Acinetobacter,  
527 Lactobacillus, and Staphylococcus. Streptococcus. (c) LEFse analysis (LDA $>2.0$ ) was performed for  
528 all groups, with corresponding differential strains for control, MV6, SV6, Acinetobacter\_radioresistens  
529 for control, Megamonas for MV6, and Parvibacter for SV6. In summary, tracheal intubation mechanical  
530 ventilation caused changes in the lower respiratory tract flora ratio in rats.

531 **Figure 3.** Alpha diversity of rat lower respiratory tract flora. (a) The observed species index decreased  
532 in the first 3 hours of mechanical ventilation and gradually increased as ventilation was prolonged. (b)  
533 Simpson index was not statistically different among groups, and the homogeneity of species was more  
534 consistent among groups. (c) Alpha diversity dilution curves leveled off in all groups, indicating a  
535 sufficient amount of data in each group.

536 **Figure 4.** Beta diversity of rat lower respiratory tract flora. (a-c) In unweighted Unifrac analysis,  
537 tracheal intubation mechanical ventilation made the rat's lower respiratory flora more fragmented. (d-f)  
538 In the weighted Unifrac analysis of all groups, tracheal intubation mechanical ventilation did not make  
539 the rat respiratory flora more dispersed. However, in comparing normal rats with the spontaneously  
540 breathing group, a more significant dispersion of the rat lower respiratory flora occurred.

541 **Figure 5.** PICRUSt2 analysis of rat lower respiratory tract flora. Thirty-three unique KEGG pathways  
542 among the inferred metagenomes. It is showed more remarkable similarities between normal rats and  
543 each ventilated group.

544 **Figure 6.** Bugbase analysis of rat lower respiratory tract flora. (a) With the associated representative  
545 genera changes, anaerobic activity is diminished at the beginning of mechanical ventilation by tracheal  
546 intubation. (b) Forms\_Biofilm is enhanced at the beginning of mechanical ventilation by tracheal  
547 intubation, and the associated representative genera are altered. (c) Gram\_Negative formation did not  
548 vary much between groups, slightly increased at the beginning of the experiment, and the proportion  
549 slightly decreased with the prolongation of the experiment.

550

551

552 **Table**

553 Table 1. Effect of mechanical ventilation on lung wet to dry weight ratio (W/D ) from rats (n=4,  $\bar{X}\pm SD$ )

554

|    | Control    | Mechanical Ventilation |                |              | Spontaneously Breathing |                |            |
|----|------------|------------------------|----------------|--------------|-------------------------|----------------|------------|
|    |            | 1h                     | 3h             | 6h           | 1h                      | 3h             | 6h         |
| W/ | 5.579±0.39 | 5.958±0.56             | 6.839±1.04     | 11.618±1.63* | 5.873±0.28              | 6.895±0.16     | 8.561±1.34 |
| D  | 3          | 9 <sup>#</sup>         | 7 <sup>#</sup> | #            | 1 <sup>#</sup>          | 3 <sup>#</sup> | 8*         |

555

556 Data are means and(sd) for control, Mechanical Ventilation(1, 3, 6 h) and Spontaneously Breathing (1,

557 3, 6 h) rats.

558 Value are mean ± SD.

559 \*p<0.05 vs control . #p<0.05 vs mechanical ventilaition 6

560



561 **Funding**

562 This study was supported by the Guangdong Provincial Science and Technology Project (NO.  
563 2017B020235001)

564

565 **Acknowledgements**

566 We thank the Animal Experimentation of Nanfang Hospital, Southern Medical University (Guangzhou,  
567 China) for performing animals and experimental sites. We are grateful for the sequencing platform or  
568 bio information analysis of Gene Denovo Biotechnology Co., Ltd (Guangzhou, China).

1 Figure

2 Figure 1.

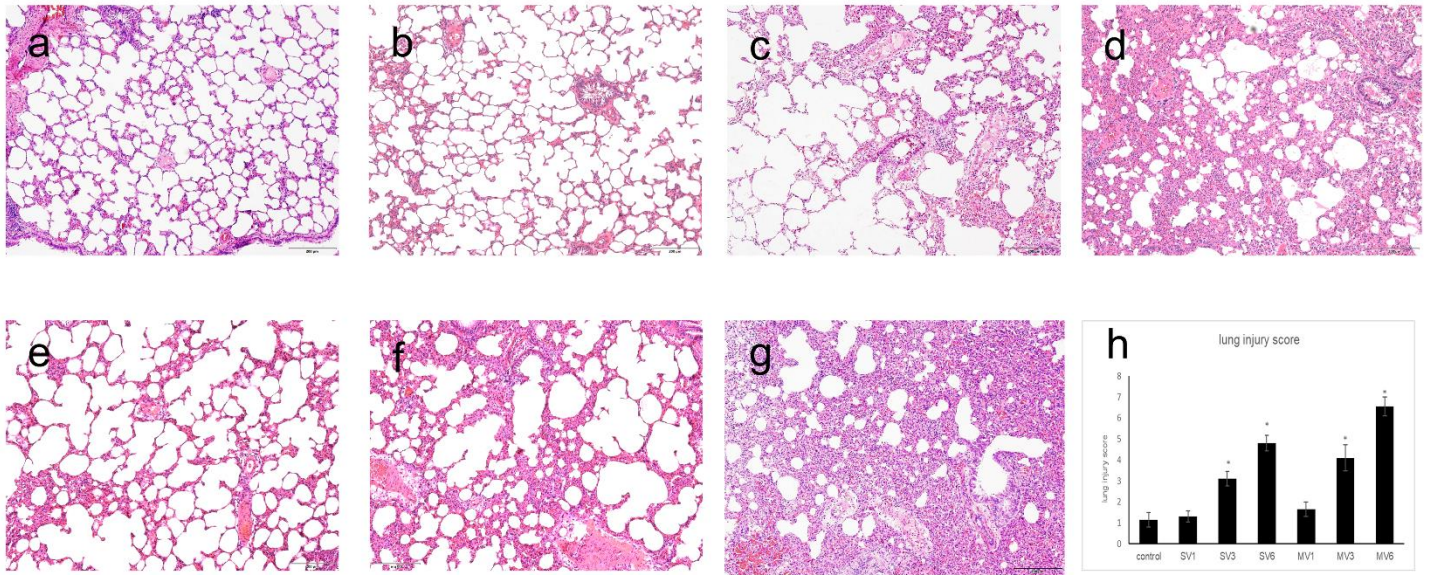

3

4 **Figure 1.** Effect of mechanical ventilation on lung tissues injury from rats. (a) Rats were executed

5 directly after tracheal intubation under anesthesia. (b-d) Rats were kept under anesthesia after

6 tracheal intubation with spontaneous breathing for 1, 3, and 6 h. (e-g). Rats were mechanically

7 ventilated for 1, 3, and 6 h after tracheal intubation. (h) Lung tissue injury score. Data are

8 representative of at least four different experiments. Results are mean ± S, for four rats. \*p<0.05,

9 \*\*p<0.01, \*\*\*p<0.001, compared with control animals or between mechanical ventilation six hours and

10 spontaneous breathing six hours.

11

12

13 **Figure 2**

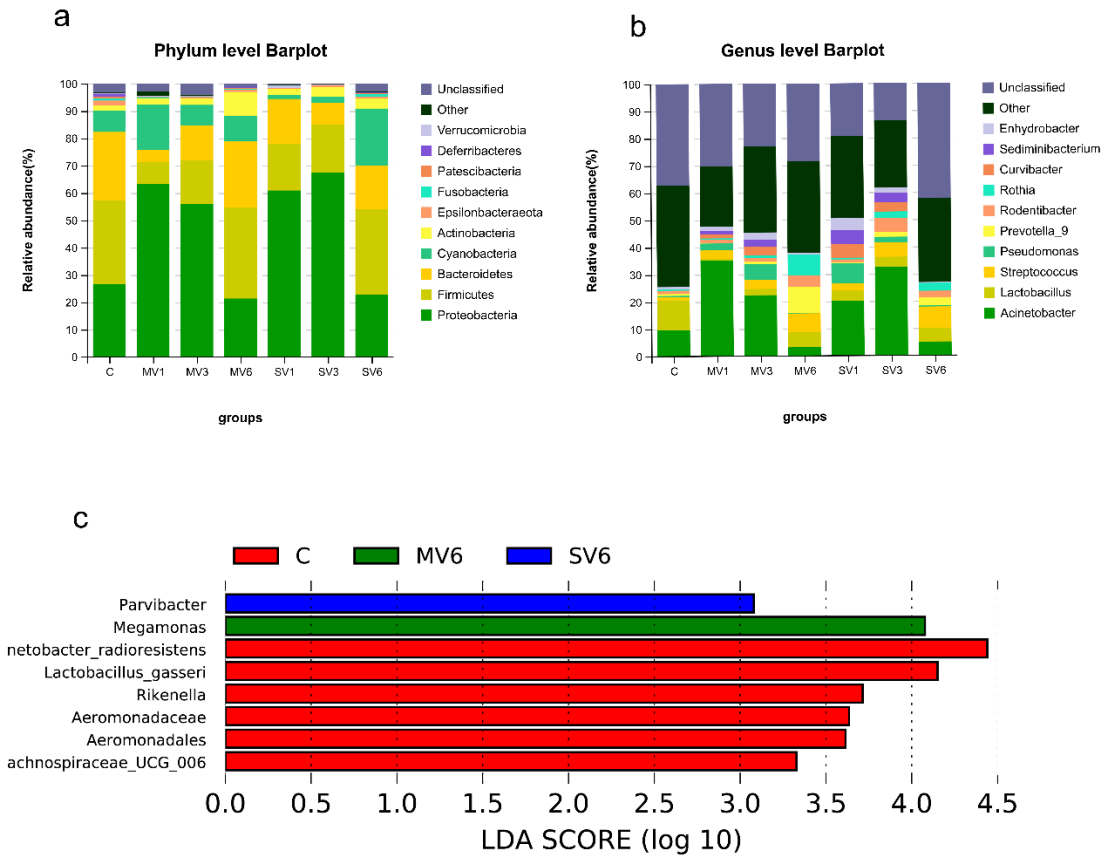

14

15 **Figure 2.** Changes in the lower respiratory tract flora of rats during mechanical ventilation. (a) At the  
 16 phylum level, the main dominant phyla were Proteobacteria, Firmicutes, Bacteroidetes,  
 17 Cyanobacteria, and Actinobacteria. (b) At the genus level, the main dominant genera were  
 18 Acinetobacter, Lactobacillus, and Staphylococcus. Streptococcus. (c) LEFSe analysis (LDA>2.0) was  
 19 performed for all groups, with corresponding differential strains for control, MV6, SV6,  
 20 Acinetobacter\_radioresistens for control, Megamonas for MV6, and Parvibacter for SV6. In summary,  
 21 tracheal intubation mechanical ventilation caused changes in the lower respiratory tract flora ratio in  
 22 rats.

23 Figure3

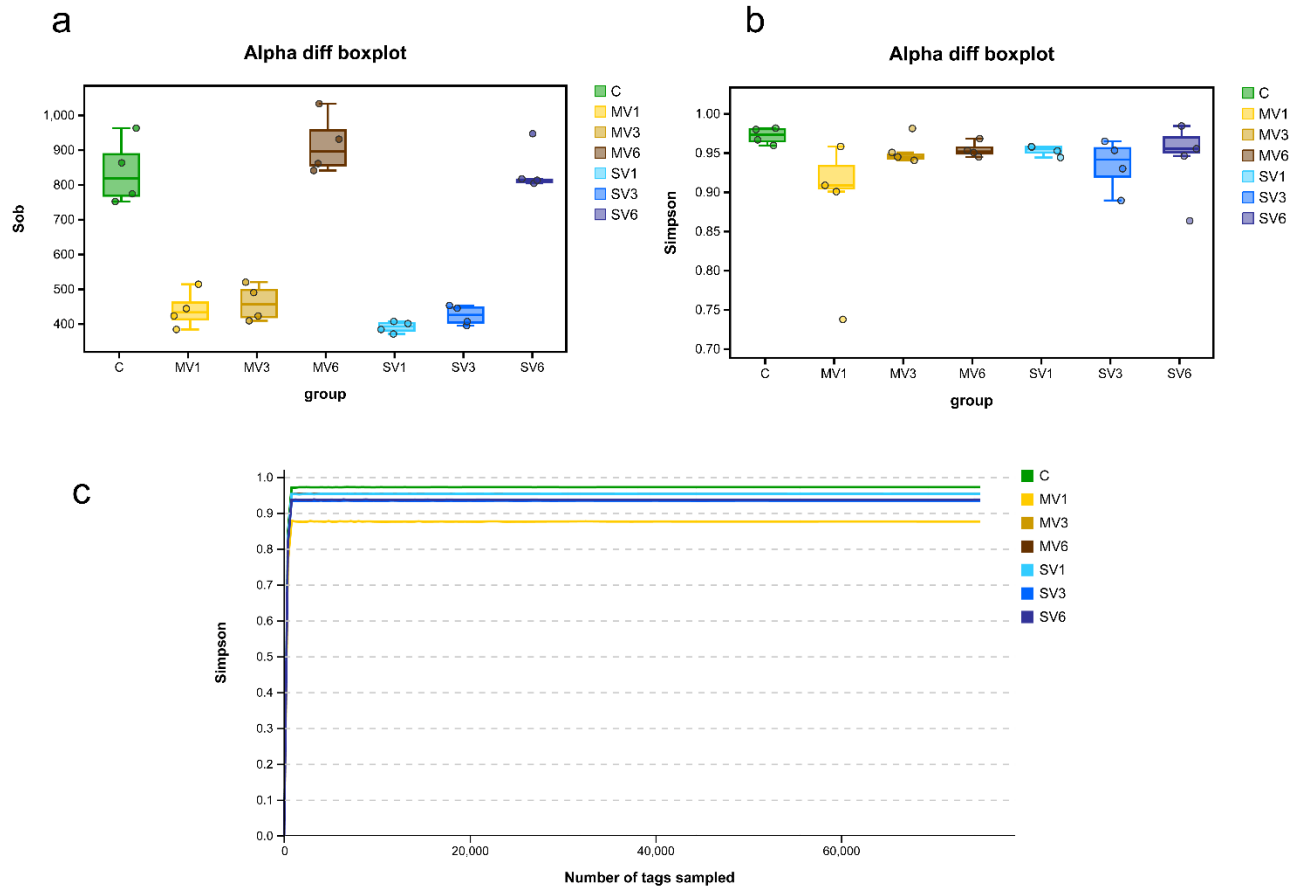

24

25 **Figure 3.** Alpha diversity of rat lower respiratory tract flora. (a) The observed species index  
26 decreased in the first 3 hours of mechanical ventilation and gradually increased as ventilation was  
27 prolonged. (b) Simpson index was not statistically different among groups, and the homogeneity of  
28 species was more consistent among groups. (c) Alpha diversity dilution curves leveled off in all  
29 groups, indicating a sufficient amount of data in each group.

30

31

32 **Figure 4**

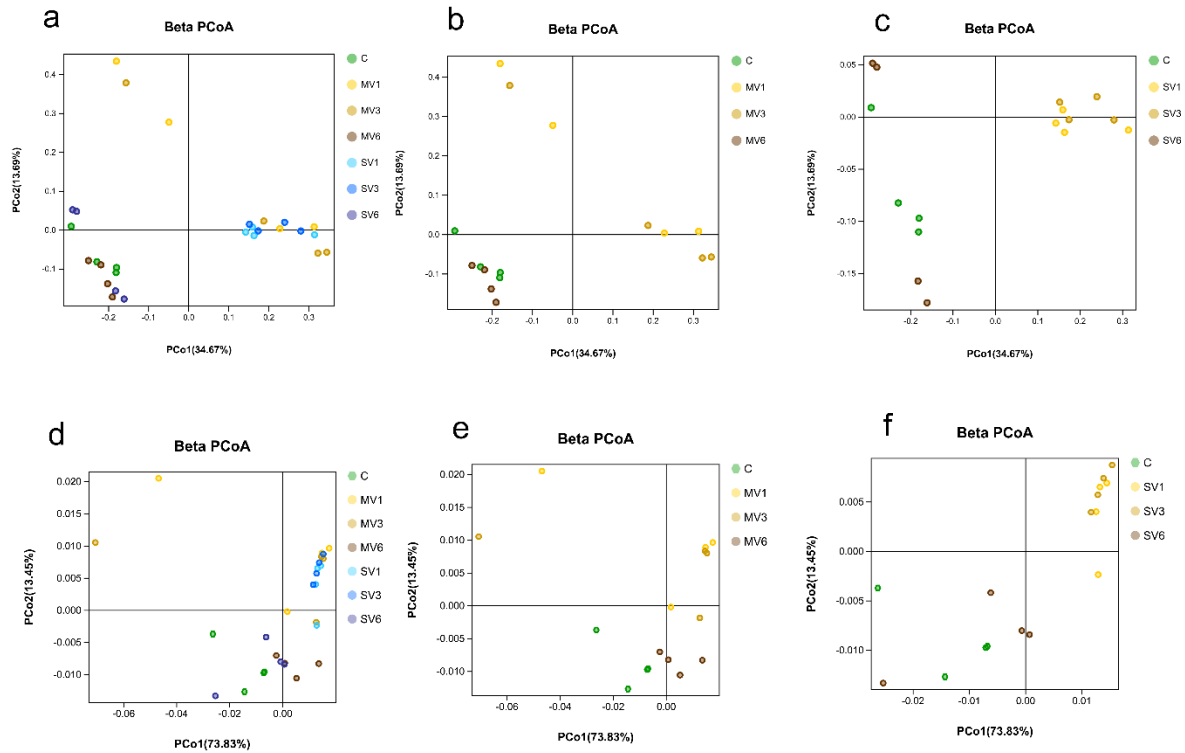

33

34 **Figure 4.** Beta diversity of rat lower respiratory tract flora. (a-c) In unweighted Unifrac analysis,  
35 tracheal intubation mechanical ventilation made the rat's lower respiratory flora more fragmented. (d-  
36 f) In the weighted Unifrac analysis of all groups, tracheal intubation mechanical ventilation did not  
37 make the rat respiratory flora more dispersed. However, in comparing normal rats with the  
38 spontaneously breathing group, a more significant dispersion of the rat lower respiratory flora  
39 occurred.

40

41 Figure 5.

42

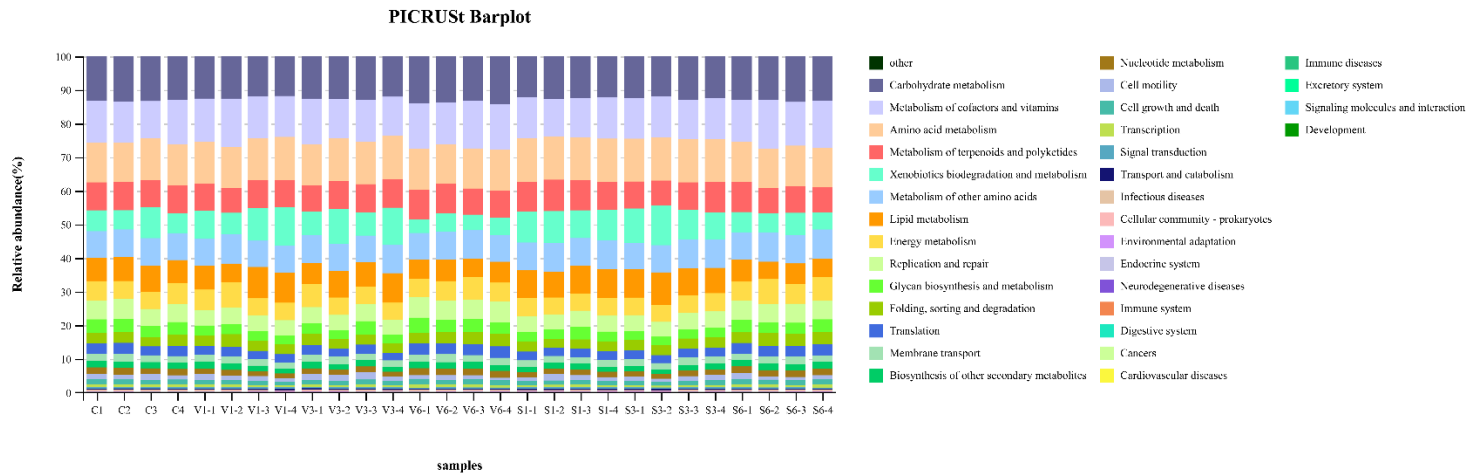

43

44 **Figure 5.** PICRUSt2 analysis of rat lower respiratory tract flora. Thirty-three unique KEGG pathways  
45 among the inferred metagenomes. It is showed more remarkable similarities between normal rats and  
46 each ventilated group.

47

48

49

50

51

52

53

54

55

56

57

58 **Figure 6.**

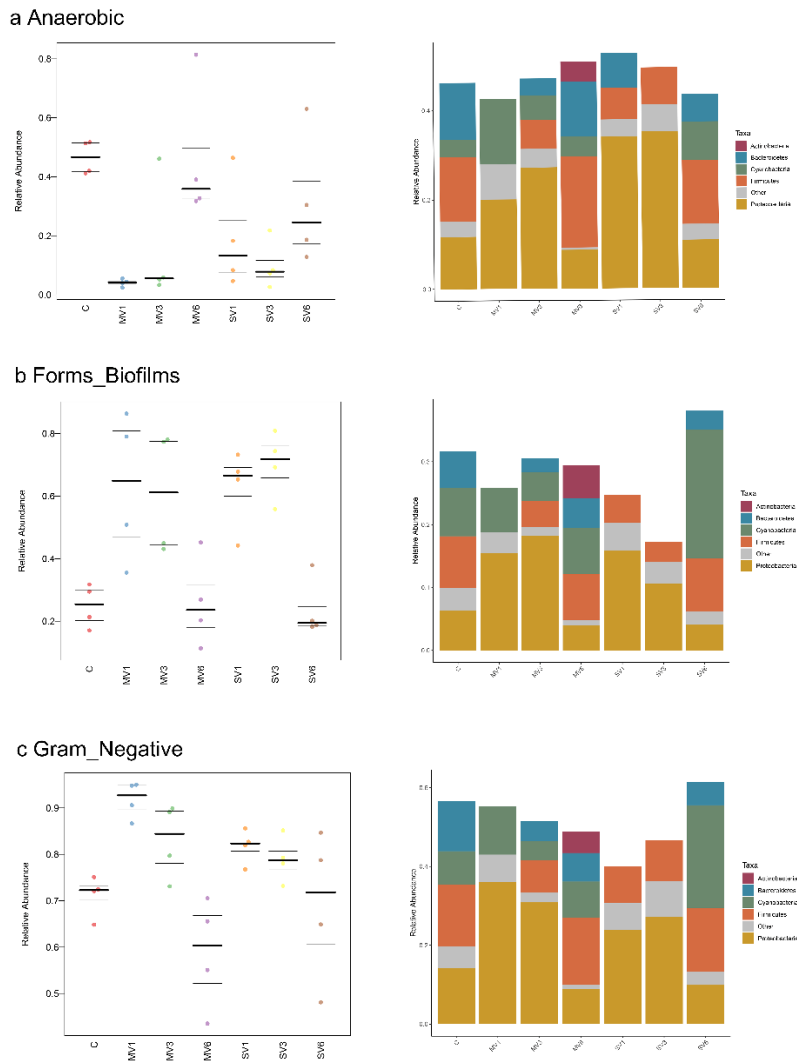

59

60 **Figure 6.** Bugbase analysis of rat lower respiratory tract flora. (a) With the associated representative  
61 genera changes, anaerobic activity is diminished at the beginning of mechanical ventilation by  
62 tracheal intubation. (b) Forms\_Biofilm is enhanced at the beginning of mechanical ventilation by  
63 tracheal intubation, and the associated representative genera are altered. (c) Gram\_Negative  
64 formation did not vary much between groups, slightly increased at the beginning of the experiment,  
65 and the proportion slightly decreased with the prolongation of the experiment.
